# Supplementary material for: Upconversion nanoparticles loaded with eIF4E siRNA and platinum(iv) prodrug to sensitize platinum based chemotherapy for laryngeal cancer and bioimaging
Source: Royal Society of Chemistry journal article supplement (doi:10.1039/c6tb02360f), 2016-11-24
Supplement: c6tb02360f1.pdf [file c6tb02360f1.pdf]

## Supporting Information

# Upconversion Nanoparticles Loaded with eIF4E siRNA and Platinum (IV) Prodrug to Sensitize Platinum Based Chemotherapy for Laryngeal Cancer and Bioimaging

*Bo Teng,<sup>a</sup> Ping'an Ma,<sup>a,b,\*</sup> Chang Yu,<sup>b,c</sup> Xinyang Zhang,<sup>b</sup> Qingjie Feng,<sup>a</sup> Lianji Wen,<sup>a</sup> Chunxia Li,<sup>b</sup> Ziyong Cheng,<sup>b</sup> Dayong Jin,<sup>d</sup> and Jun Lin<sup>b,\*</sup>*

<sup>a</sup>Department of Otolaryngology Head and Neck Surgery, The Second Hospital, Jilin University, Changchun, 130041, China.

<sup>b</sup>State Key Laboratory of Rare Earth Resource Utilization, Changchun Institute of Applied Chemistry, Chinese Academy of Sciences, Changchun, 13002, P. R. China.

<sup>c</sup>University of Chinese Academy of Sciences, Beijing, 100049, People's Republic of China

<sup>d</sup>Institute for Biomedical Materials and Devices, Faculty of Science, University of Technology Sydney, NSW, 2007, Australia.

**\*E-mail: [jlin@ciac.ac.cn](mailto:jlin@ciac.ac.cn) (Prof. Jun Lin) and [mapa675@ciac.ac.cn](mailto:mapa675@ciac.ac.cn) (Dr. Ping'an Ma);**

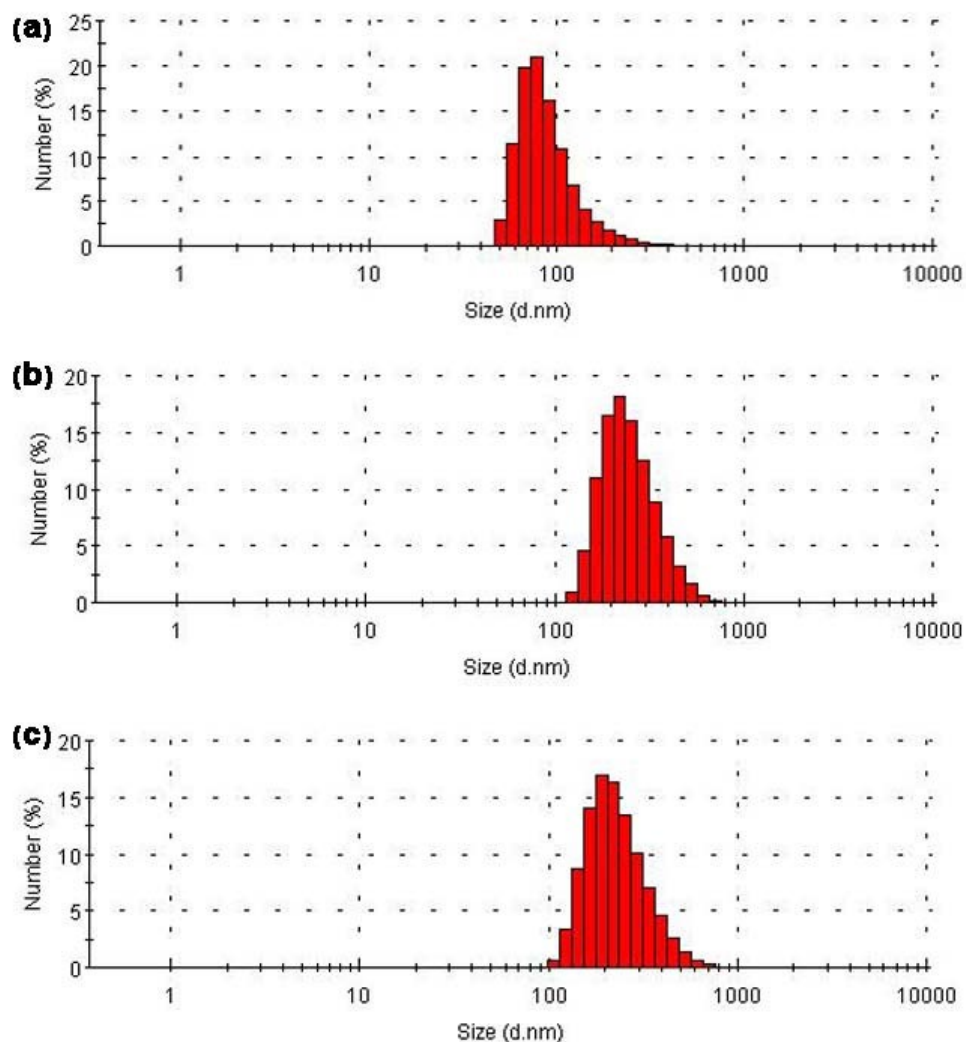

**Figure S1.** Particle size distribution of different nanoparticles in water. (a) UCNP@PEI with the average hydrodynamic diameter of 98 nm, (b) NP-1 with the average hydrodynamic diameter of 254 nm,, (c) NP-2 with the average hydrodynamic diameter of 240 nm, determined by dynamic light scattering (DLS).

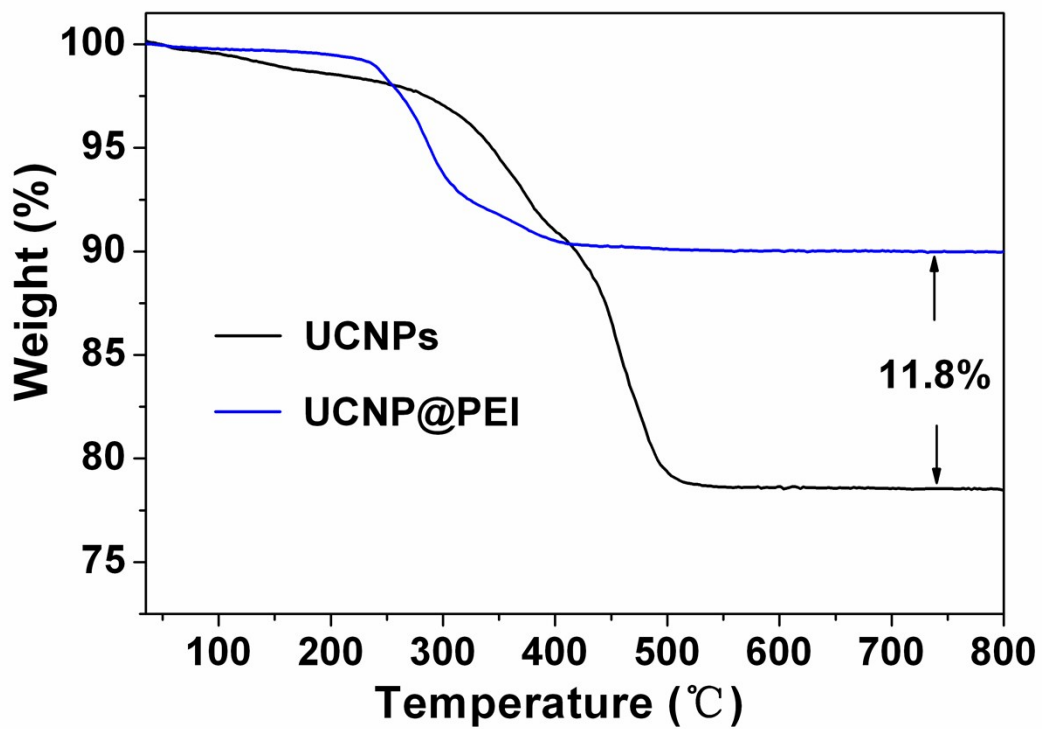

**Figure S2.** Thermo-gravimetric (TG) analysis of UCNPs, and PEI encapsulated UCNPs (UCNP@PEI) nanoparticles.

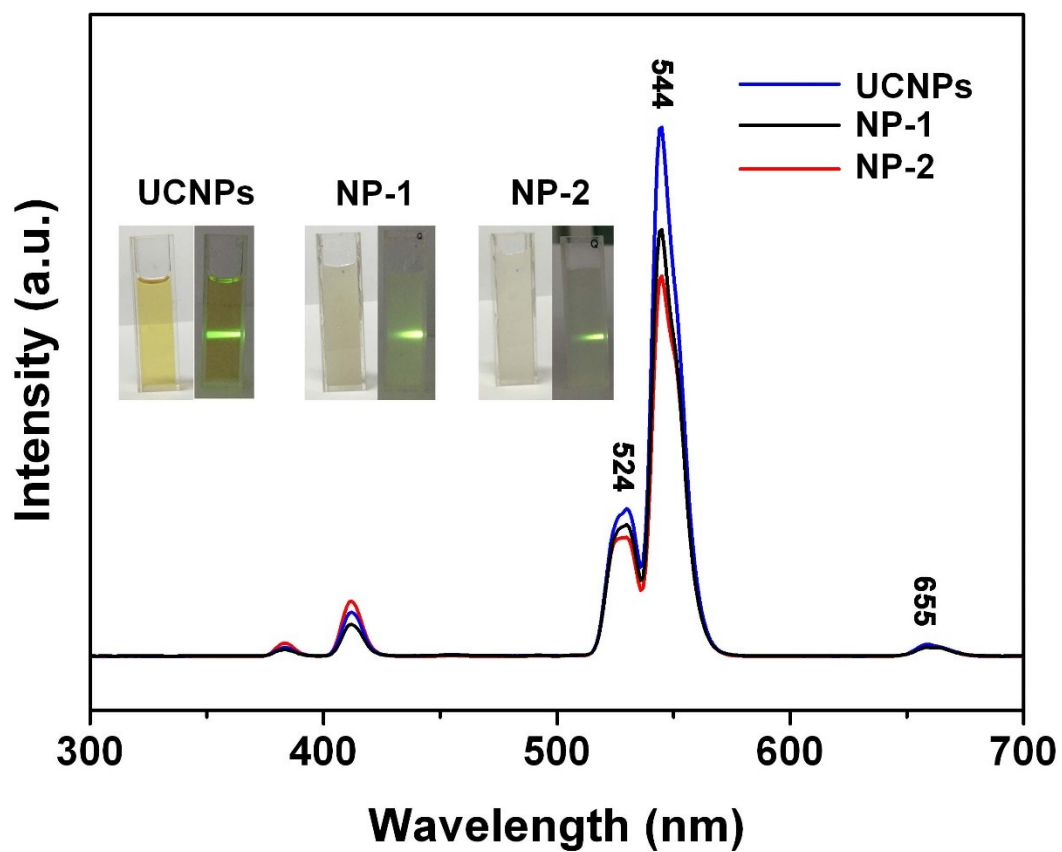

**Figure S3.** 980 nm laser excited upconversion emission spectra and digital photographs of UCNPs, NP-1 and NP-2.

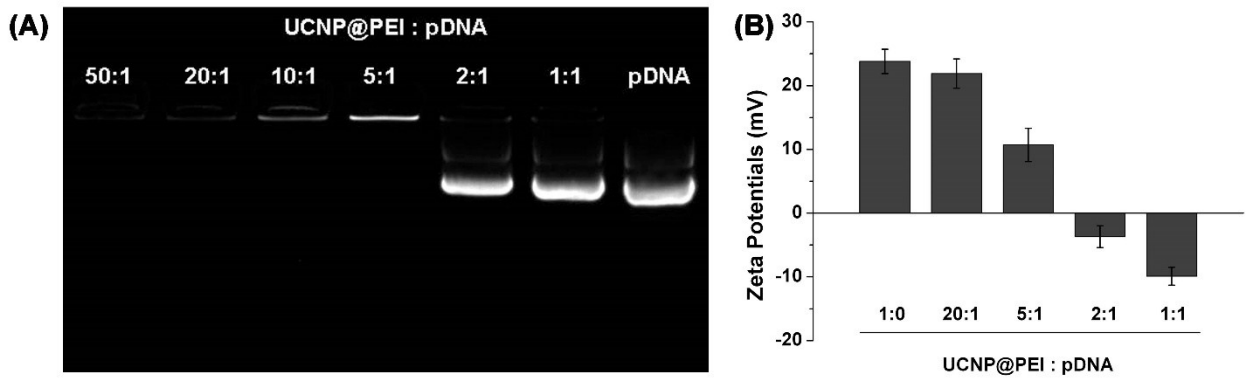

**Figure S4.** (A) Gel retardation assay. 0.5  $\mu\text{g}$  of plasmid DNA (pEGFP-N1, pDNA) was incubated with varying NP-1 nanoparticles:pDNA weight ratios (N/P ratio) of 1:1, 2:1, 5:1, 10:1, and 20:1 and the mixture was briefly vortexed. After 30 min incubation at room temperature, the mixture with addition of loading buffer was loaded on a 1% agarose gel. The electrophoresis was carried out at 100 V for 40 min in TAE buffer. (C) Zeta potential of the UCNP@PEI:pDNA.

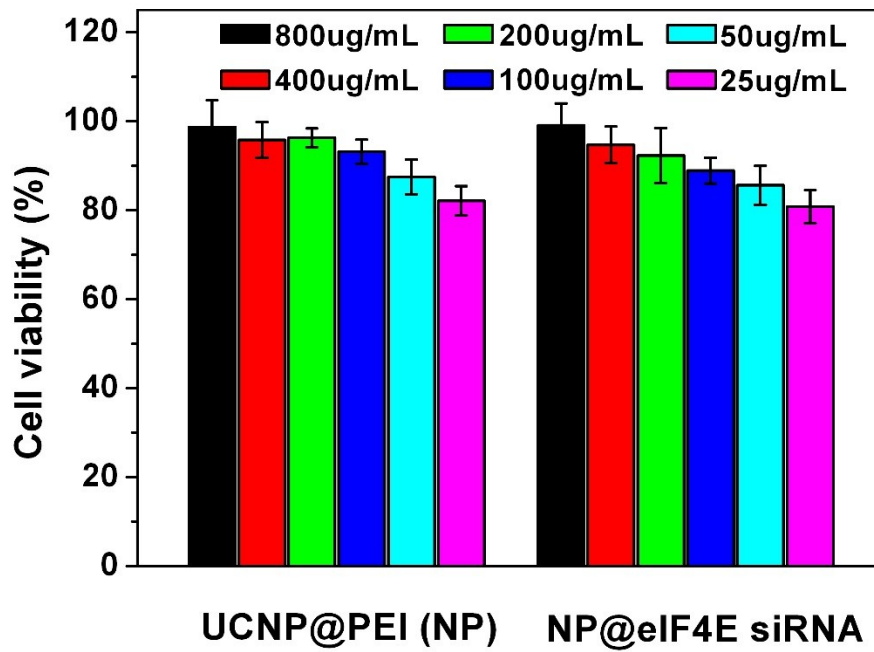

**Figure S5.** The Hep-2 cells viabilities after incubation with UCNP@PEI nanoparticles (NP) and UCNP@PEI@eIF4E siRNA (NP@ eIF4E siRNA) for 48 h measured by MTT assay.

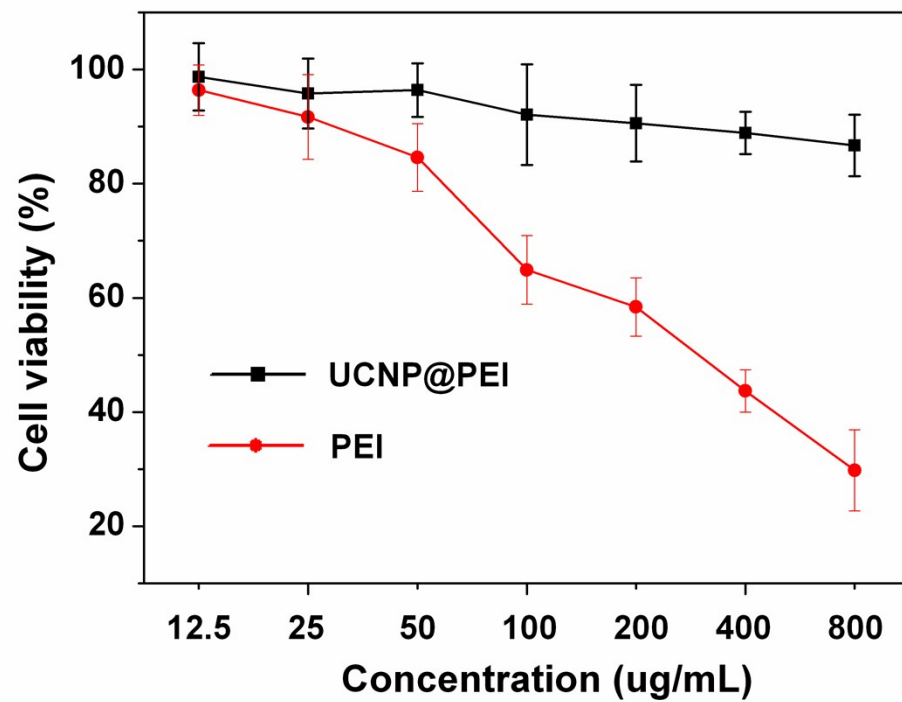

**Figure S6.** The L929 fibroblast cells viabilities after incubation with UCNP@PEI nanoparticles (without platinum) and PEI for 48 h measured by MTT assay.

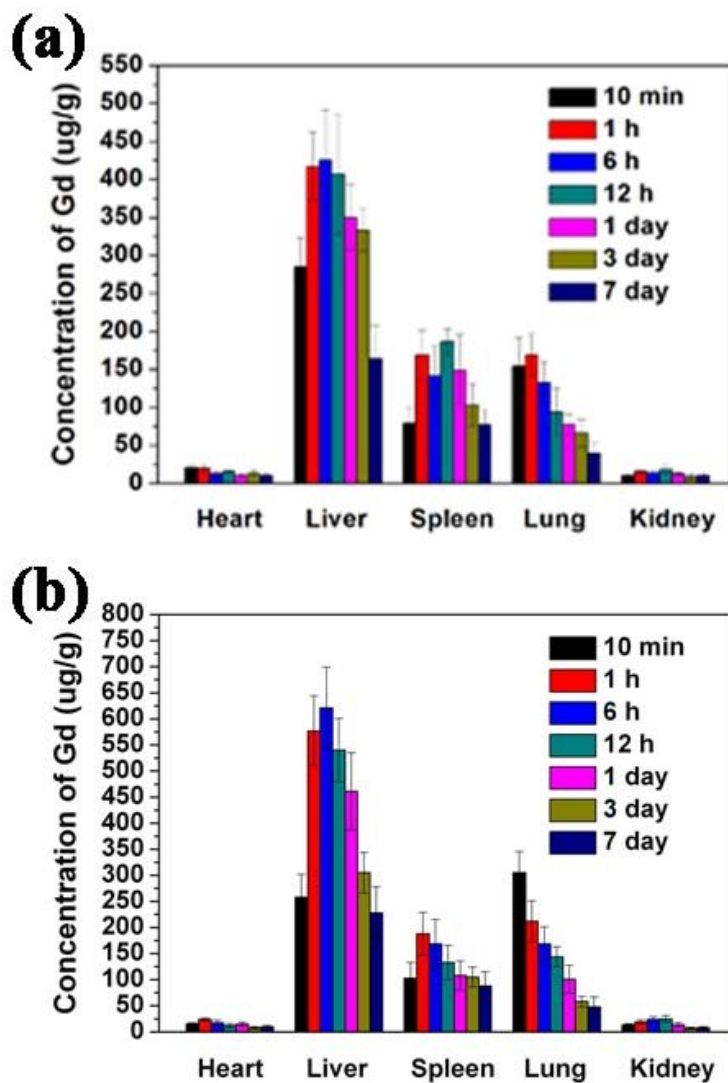

**Figure S7.** *In vivo* biodistribution of UCNP@PEI (a) and NP-2 (b). The biodistribution is measured by testing the Gd<sup>3+</sup> concentration in collected tissues and organs by ICP-MS.



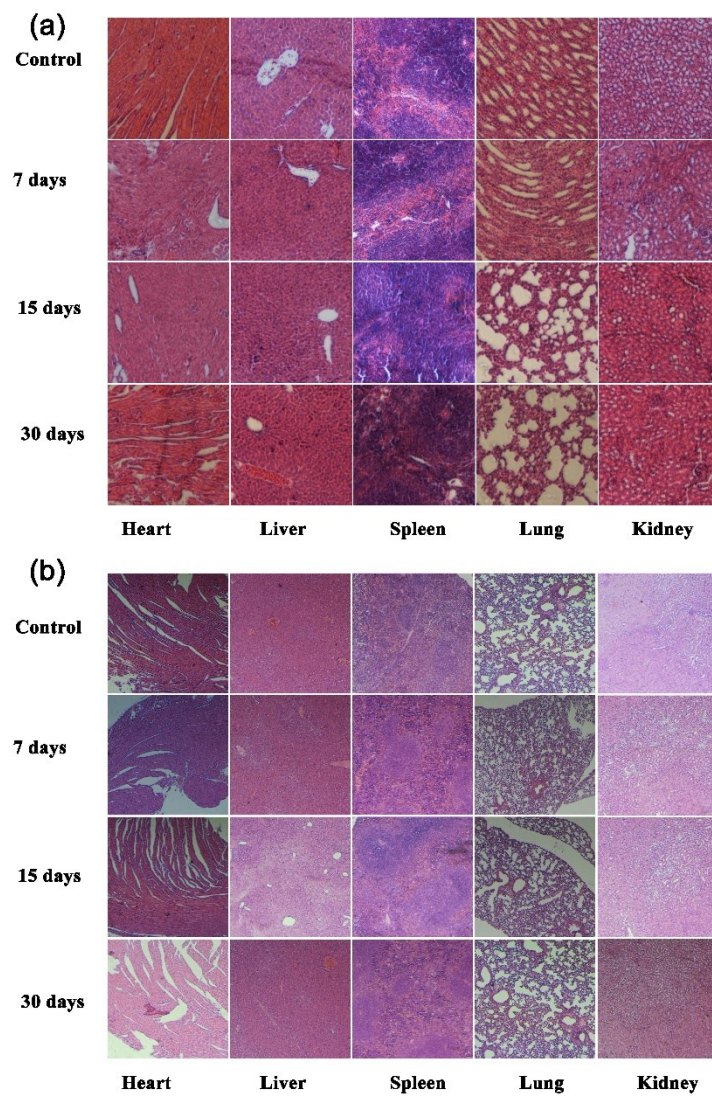

**Figure S8.** H&E immune-staining of organs collected after treatment of UNCP@PEI (a) and NP-2 (b) for 7 days, 15 days and 30 days.

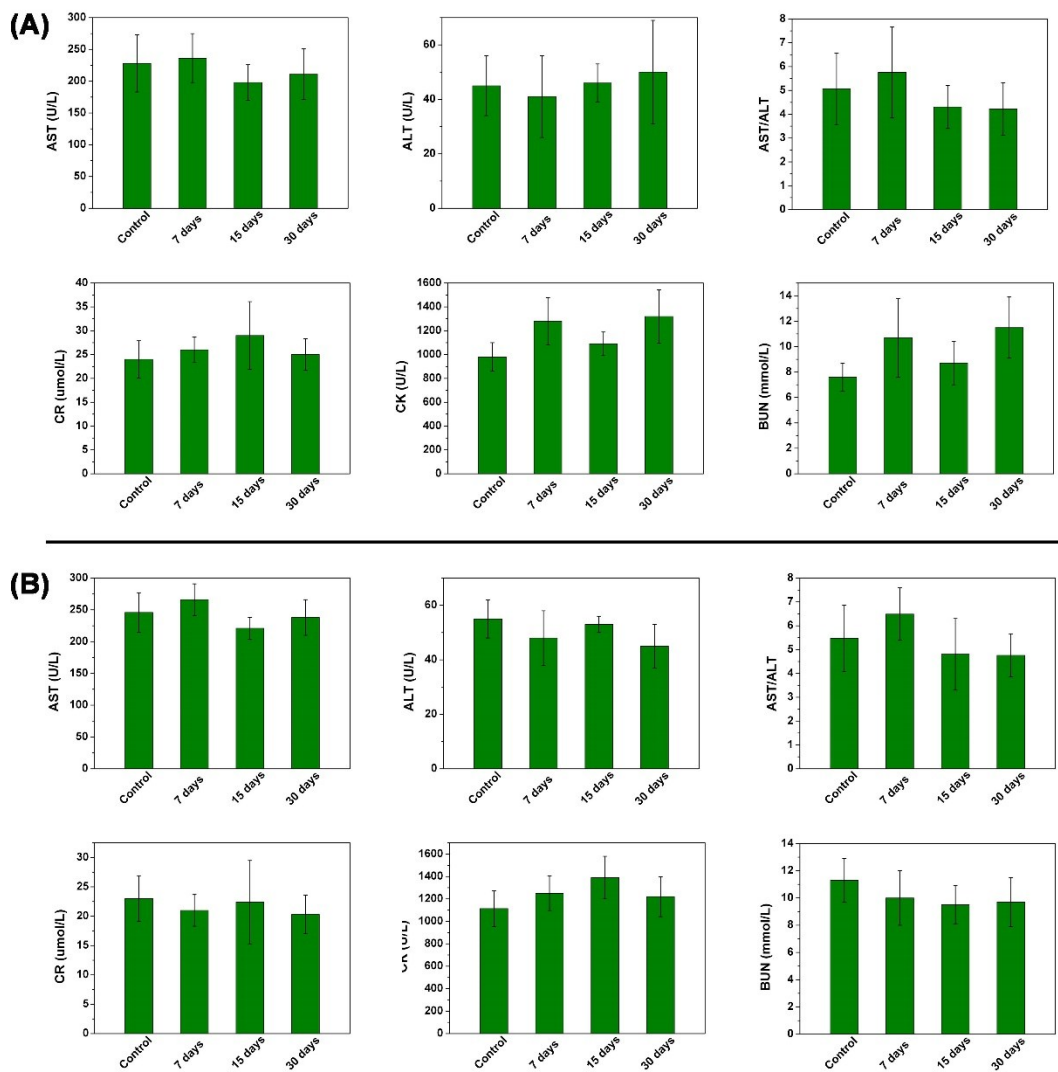

**Figure S9.** Blood analysis of the mice after treatment of UCNP@PEI (A) and NP-2 (B) for 7 days, 15 days and 30 days.

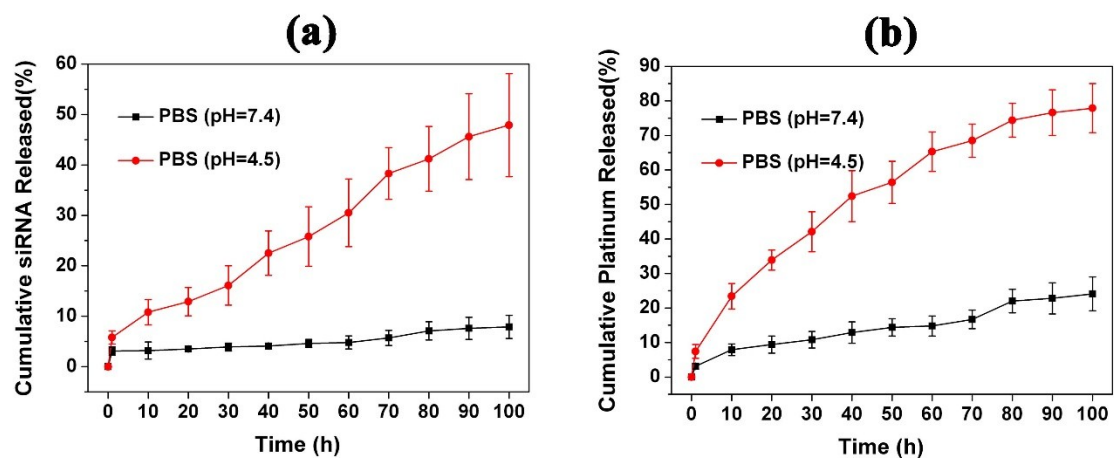

**Figure S10.** The cumulative release of siRNA (a) and Pt (b) at pH 7.5 and pH 4.5.
